# Supplementary material for: Synthesis of stereodiblock polyisoprene consisting of cis-1,4 and trans-1,4 sequences by using a neodymium catalyst: change of the stereospecificity triggered by an aluminum compound
Source: Royal Society of Chemistry journal article supplement (doi:10.1039/c5py01872b), 2016-01-01
Supplement: c5py01872b1.pdf [file c5py01872b1.pdf]

## Supporting Information

Synthesis of stereodiblock polyisoprene consisting of *cis*-1,4 and *trans*-1,4 sequences by neodymium catalyst: change of the stereospecificity triggered by aluminum compound

*Ryo Tanaka, Kaede Yuuya, Hiroki Sato, Peter Eberhardt, Yuushou Nakayama and Takeshi Shiono\**

### Table of Contents

|                                                                |      |
|----------------------------------------------------------------|------|
| <sup>1</sup> H and <sup>13</sup> C NMR spectra of the polymers | 2-11 |
| DSC chart of the <i>trans</i> -1,4-polyisoprene                | 12   |
| Stress-strain curve of the stereoblock polyisoprene            | 13   |

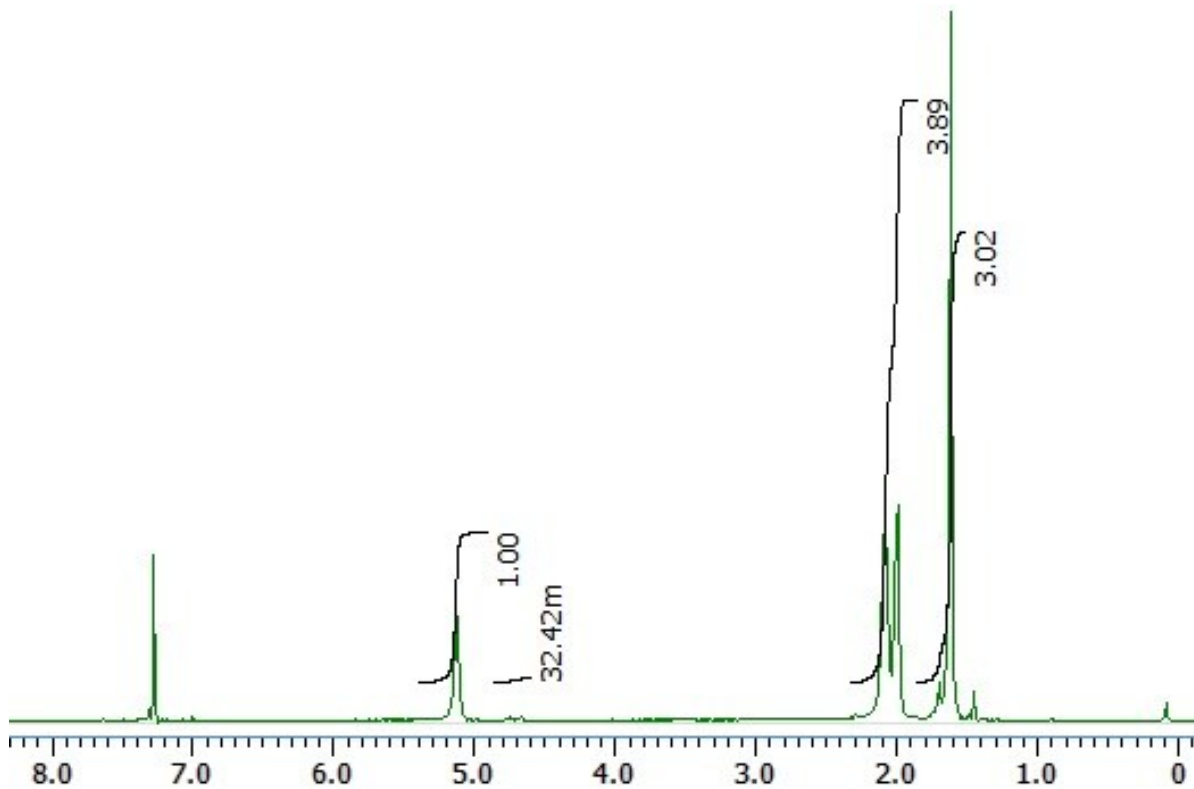

**Figure S1.** <sup>1</sup>H NMR spectrum of polyisoprene obtained in Table 1, Run 1.

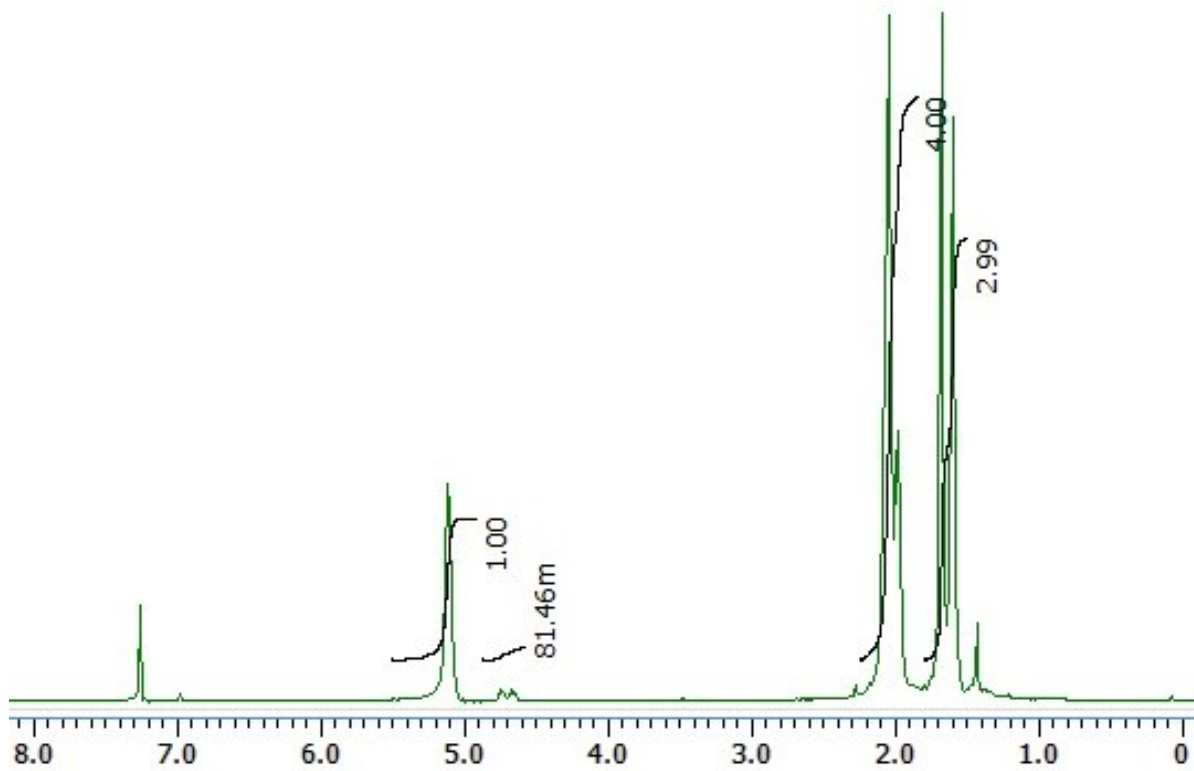

**Figure S2.** <sup>1</sup>H NMR spectrum of polyisoprene obtained in Table 1, Run 3.

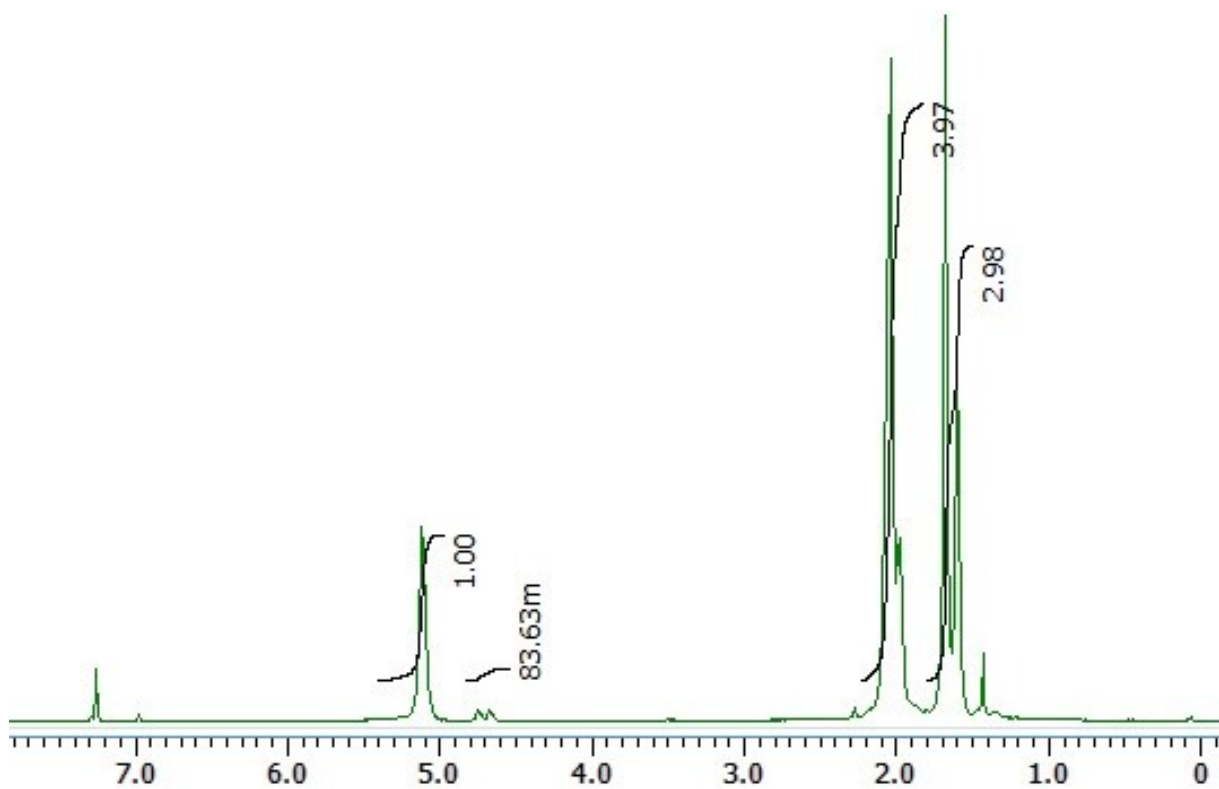

**Figure S3.** <sup>1</sup>H NMR spectrum of polyisoprene obtained in Table 1, Run 5.

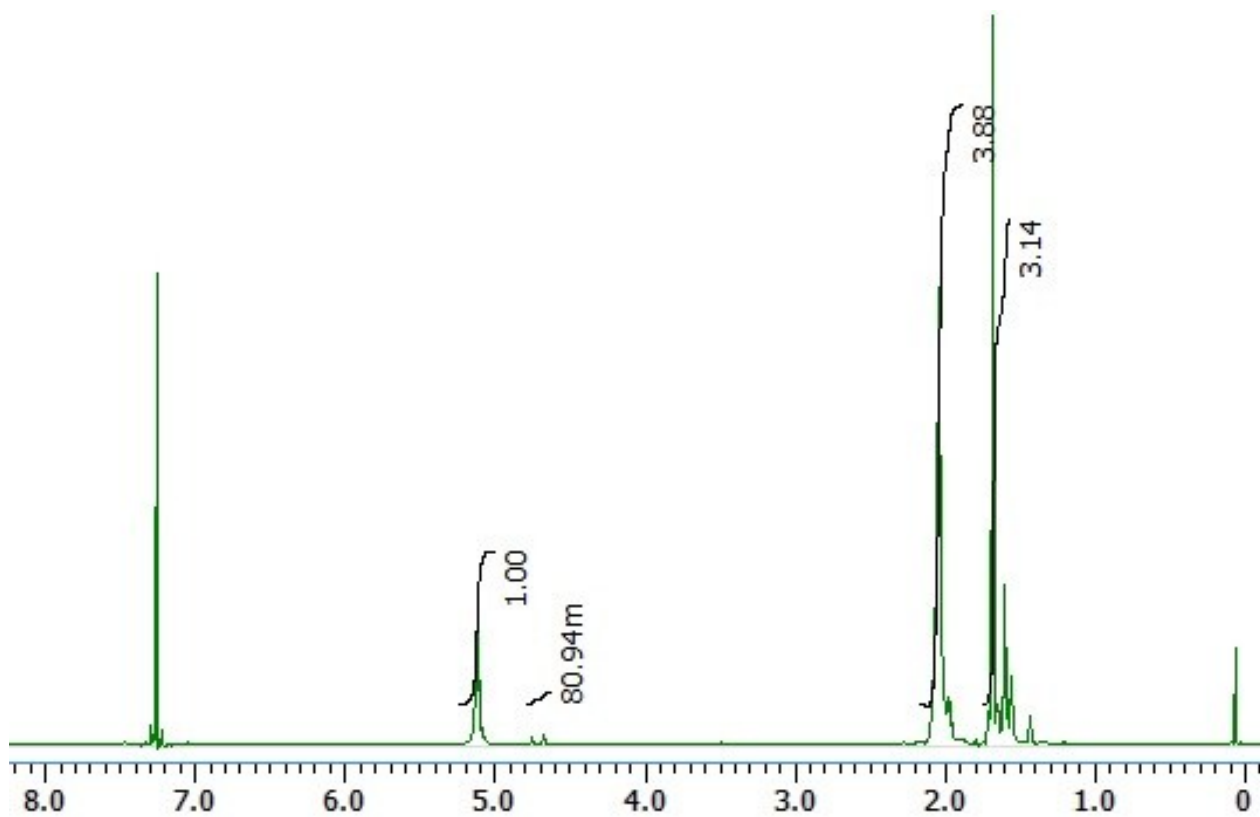

**Figure S4.** <sup>1</sup>H NMR spectrum of polyisoprene obtained in Table 1, Run 6.

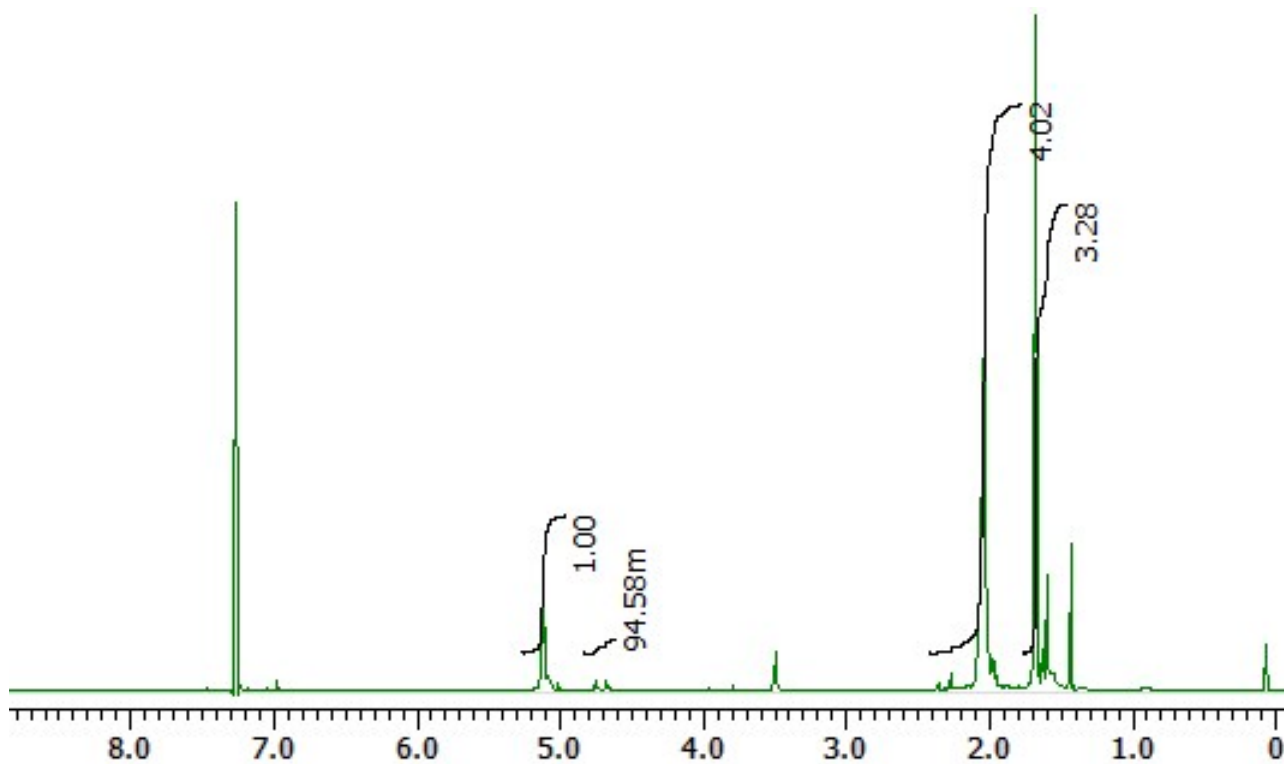

**Figure S5.** <sup>1</sup>H NMR spectrum of polyisoprene obtained in Table 1, Run 7.

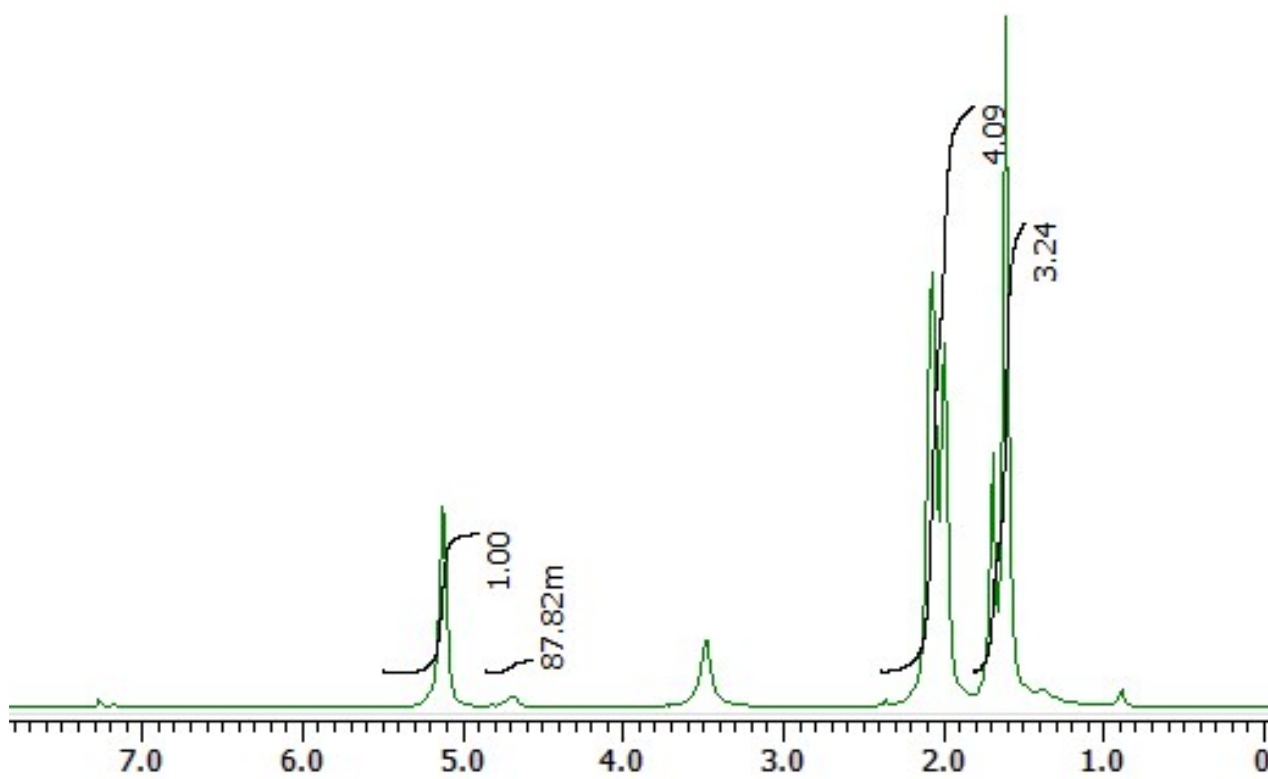

**Figure S6.** <sup>1</sup>H NMR spectrum of polyisoprene obtained in Table 1, Run 8.

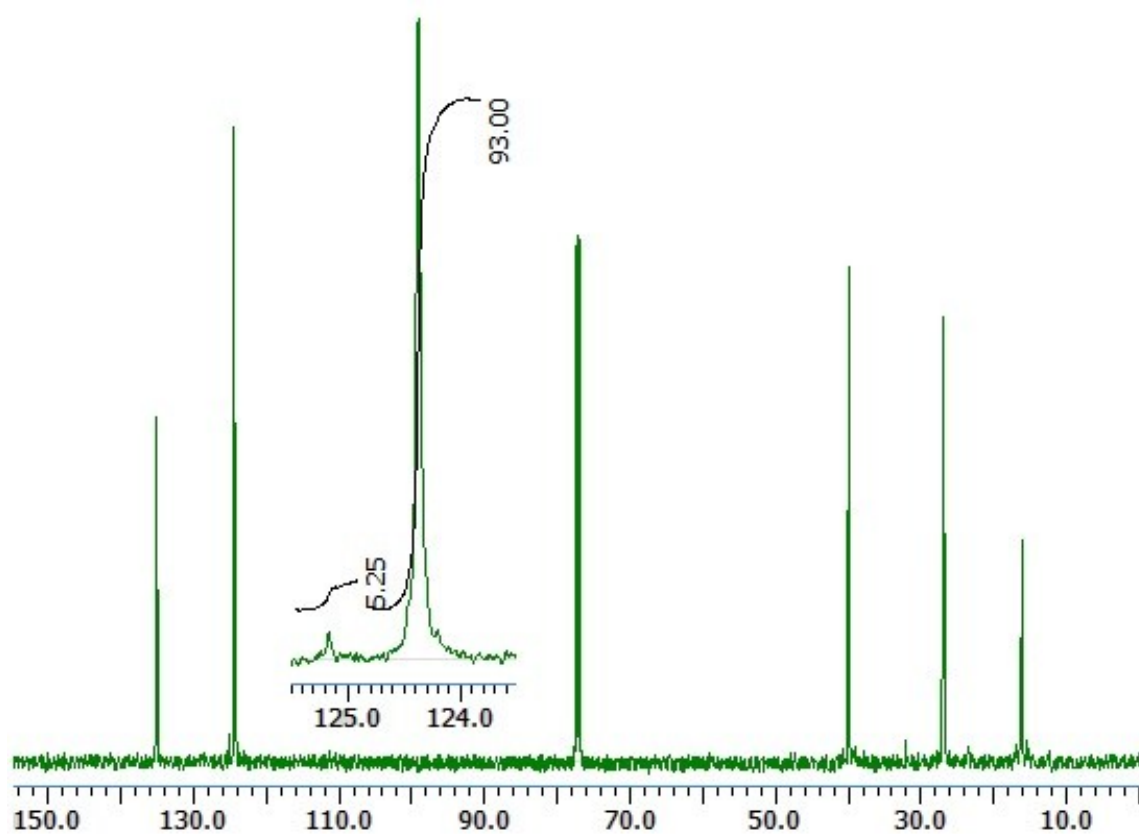

**Figure S7.**  $^{13}\text{C}$  NMR spectrum of polyisoprene obtained in Table 1, Run 1.

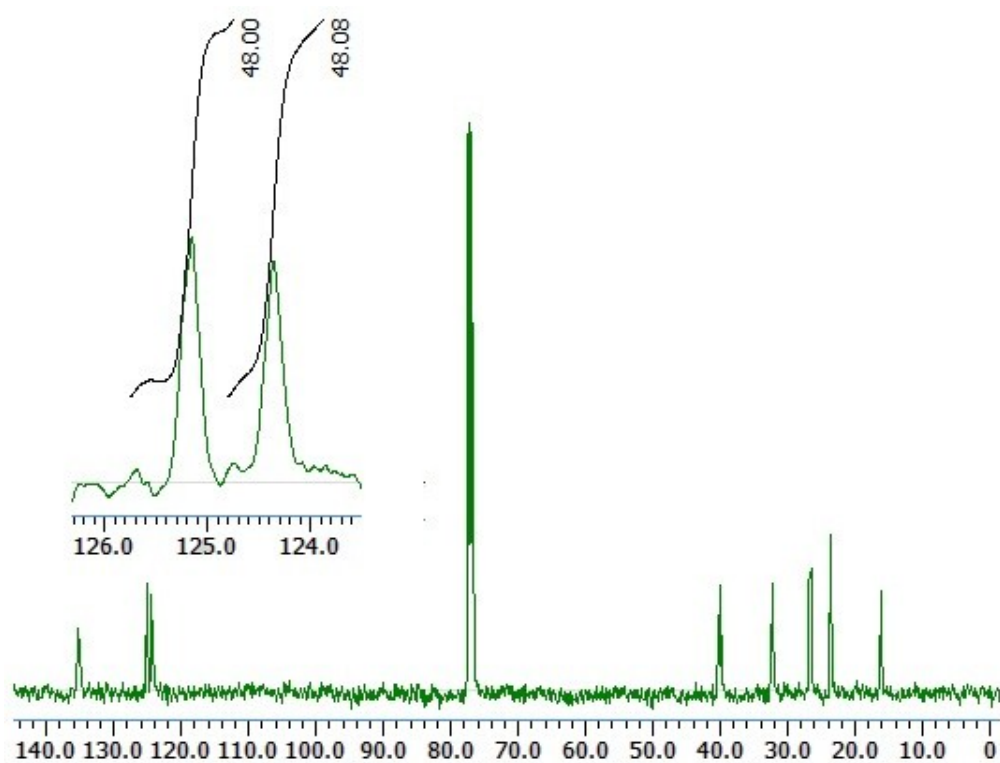

**Figure S8.**  $^{13}\text{C}$  NMR spectrum of polyisoprene obtained in Table 1, Run 3.

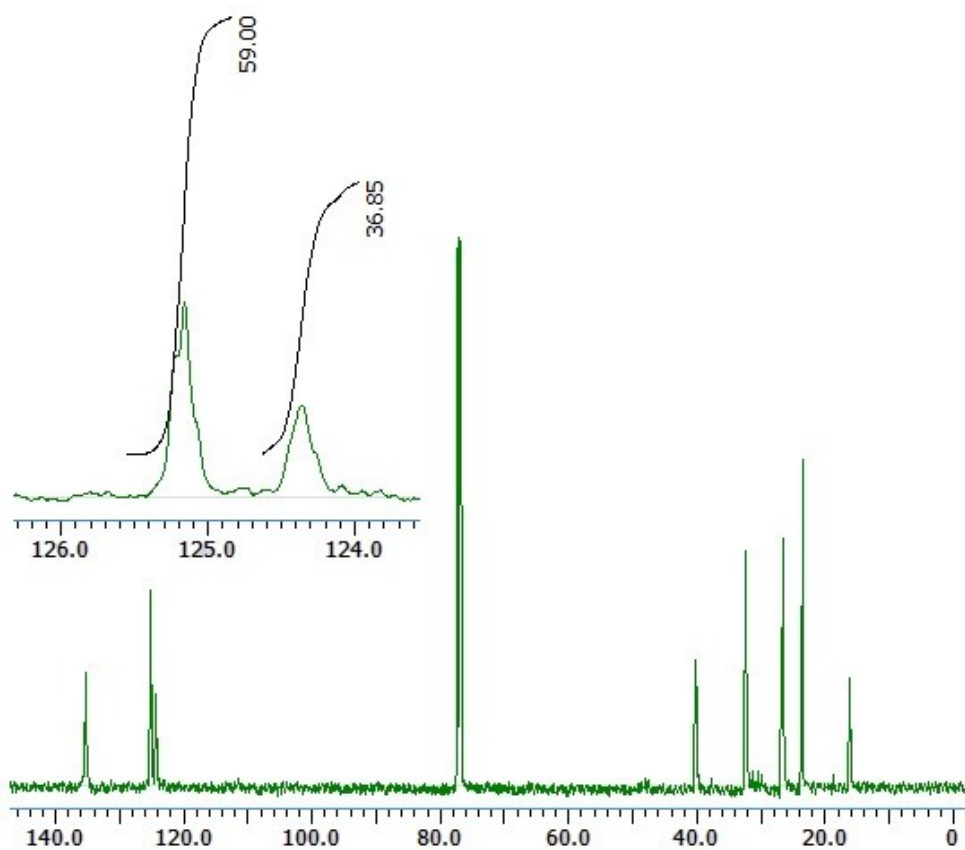

Figure S9.  $^{13}\text{C}$  NMR spectrum of polyisoprene obtained in Table 1, Run 5.

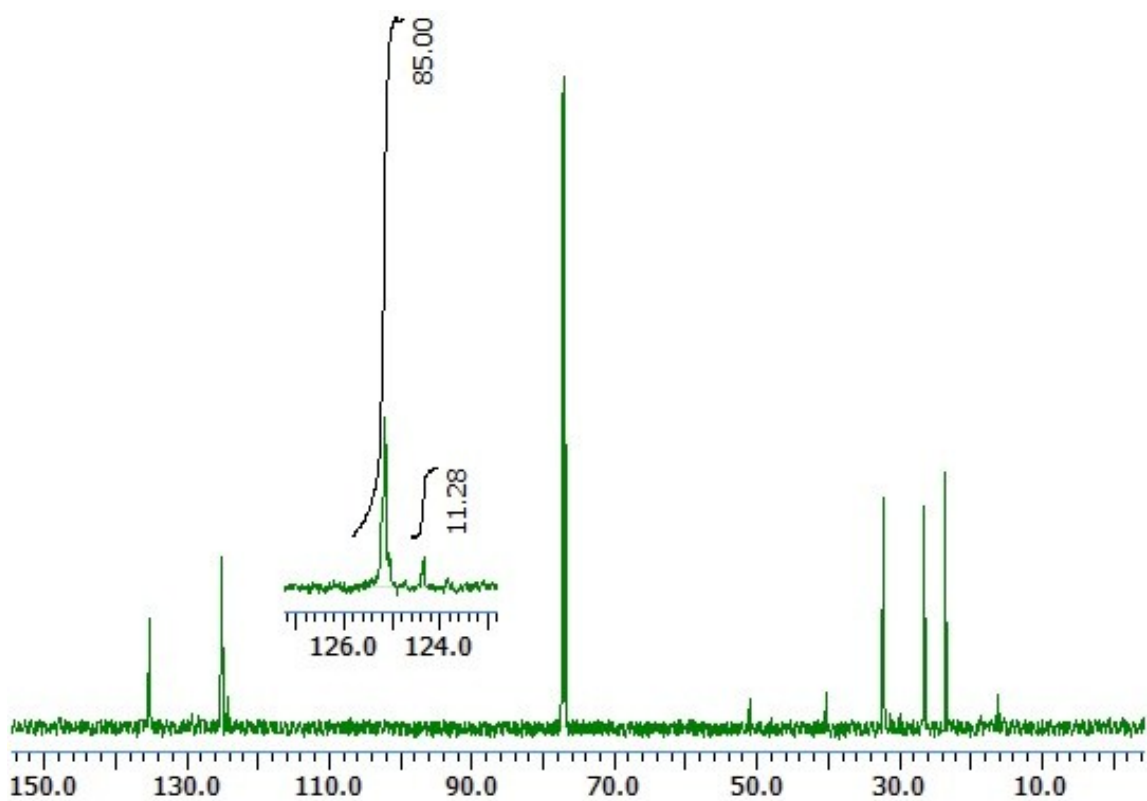

**Figure S10.**  $^{13}\text{C}$  NMR spectrum of polyisoprene obtained in Table 1, Run 6.

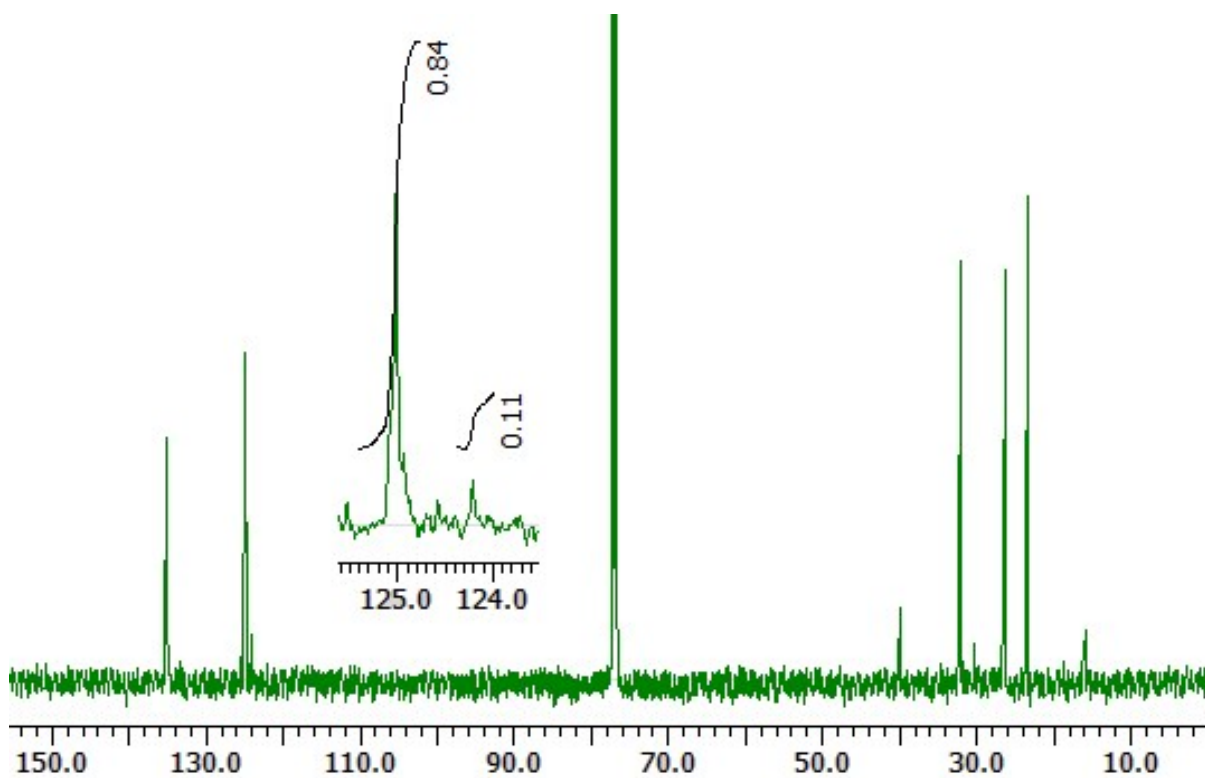

**Figure S11.**  $^{13}\text{C}$  NMR spectrum of polyisoprene obtained in Table 1, Run 7.

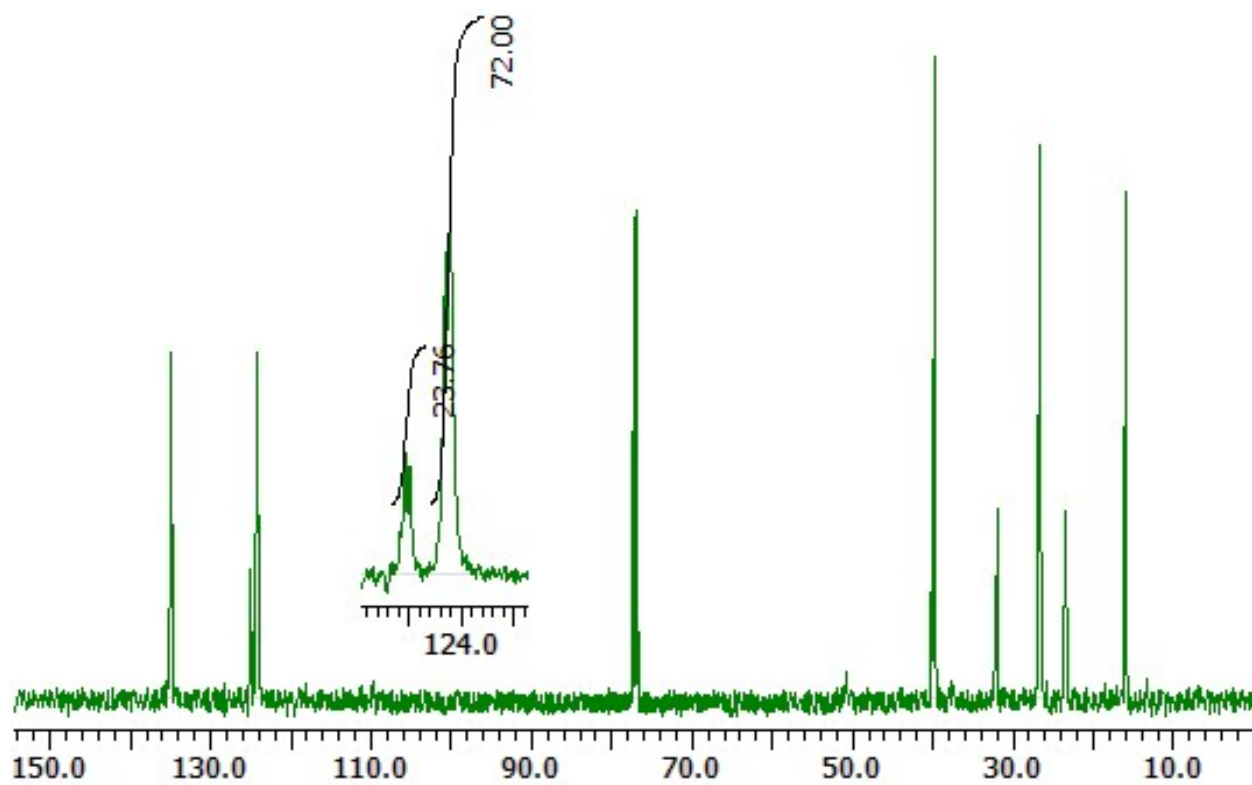

**Figure S12.**  $^{13}\text{C}$  NMR spectrum of polyisoprene obtained in Table 1, Run 8.

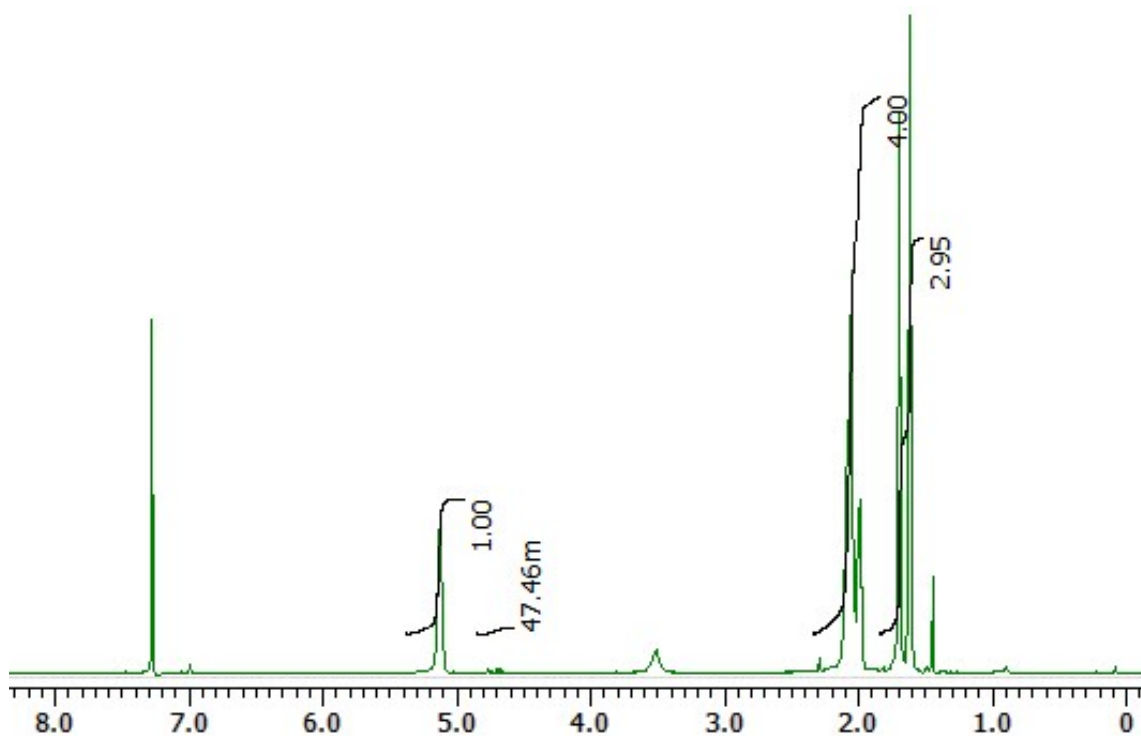

**Figure S13.**  $^1\text{H}$  NMR spectrum of stereodiblock polyisoprene obtained in Table 2, Run 2.

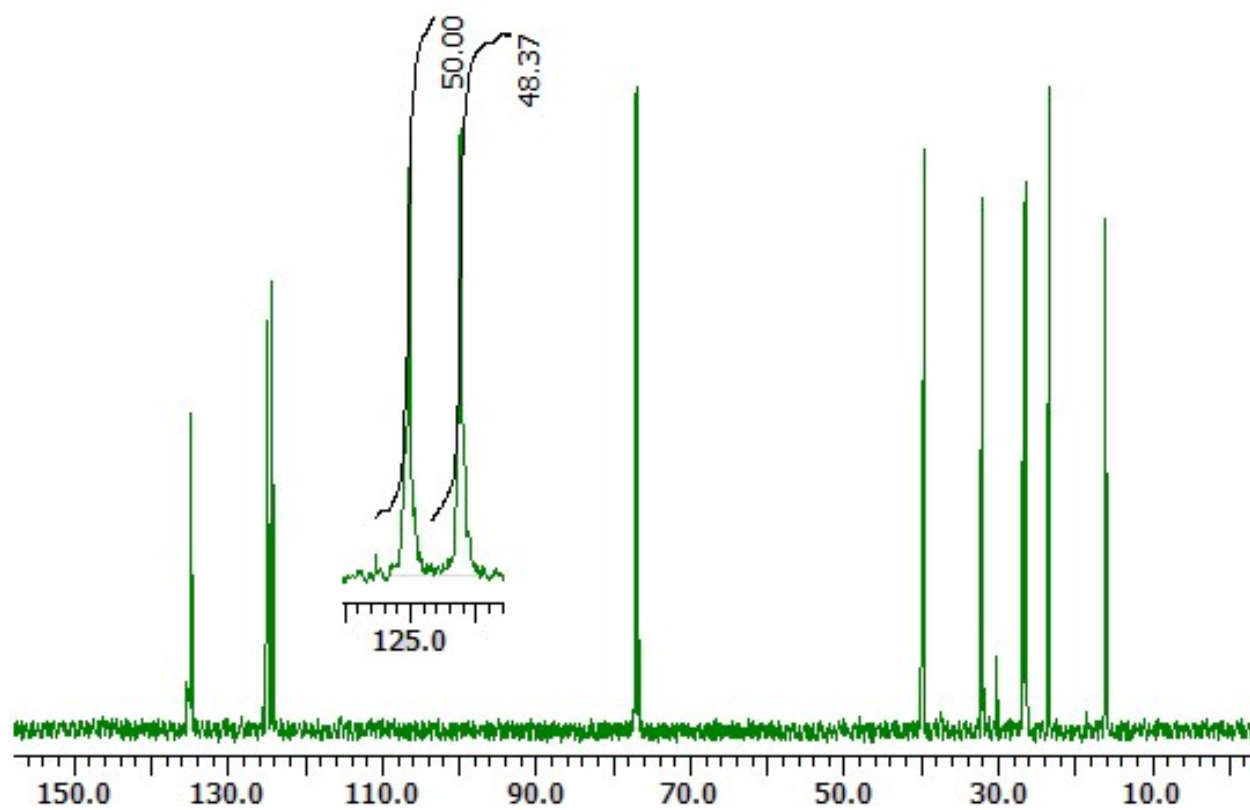



**Figure S14.**  $^{13}\text{C}$  NMR spectrum of stereodiblock polyisoprene obtained in Table 2, Run 2.

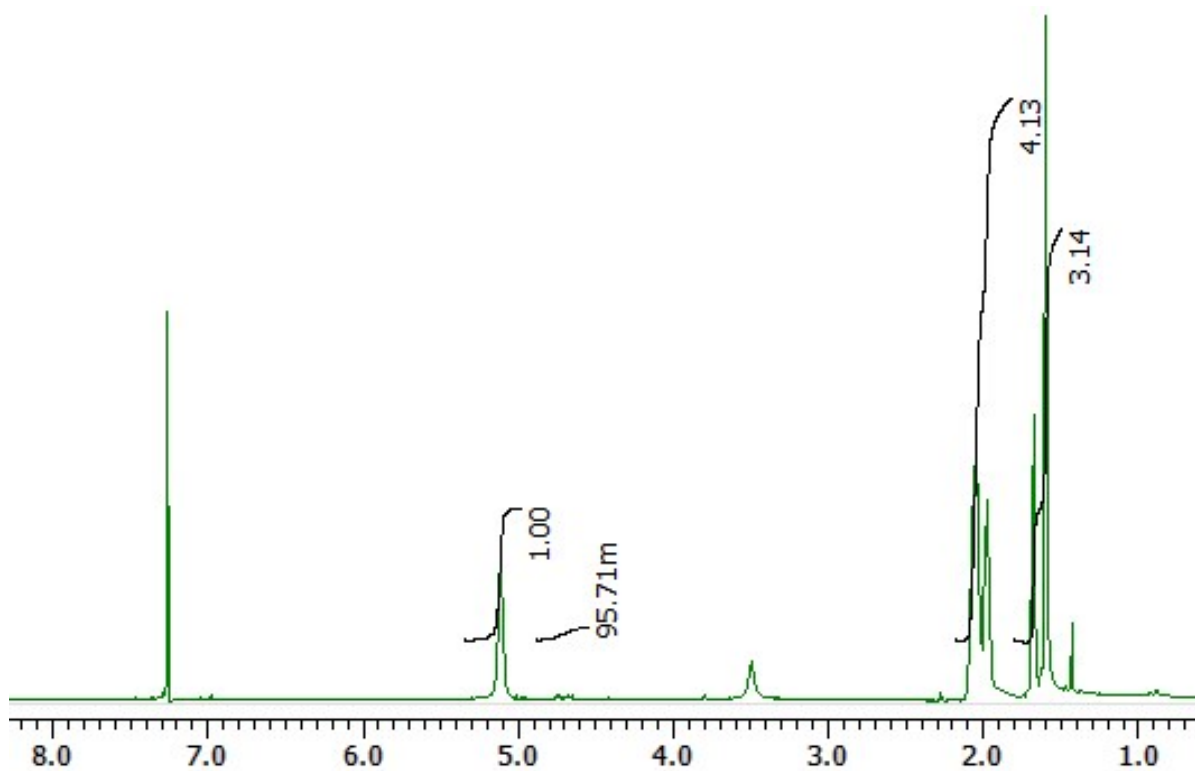

**Figure S15.**  $^1\text{H}$  NMR spectrum of stereodiblock polyisoprene obtained in Table 2, Run 3.

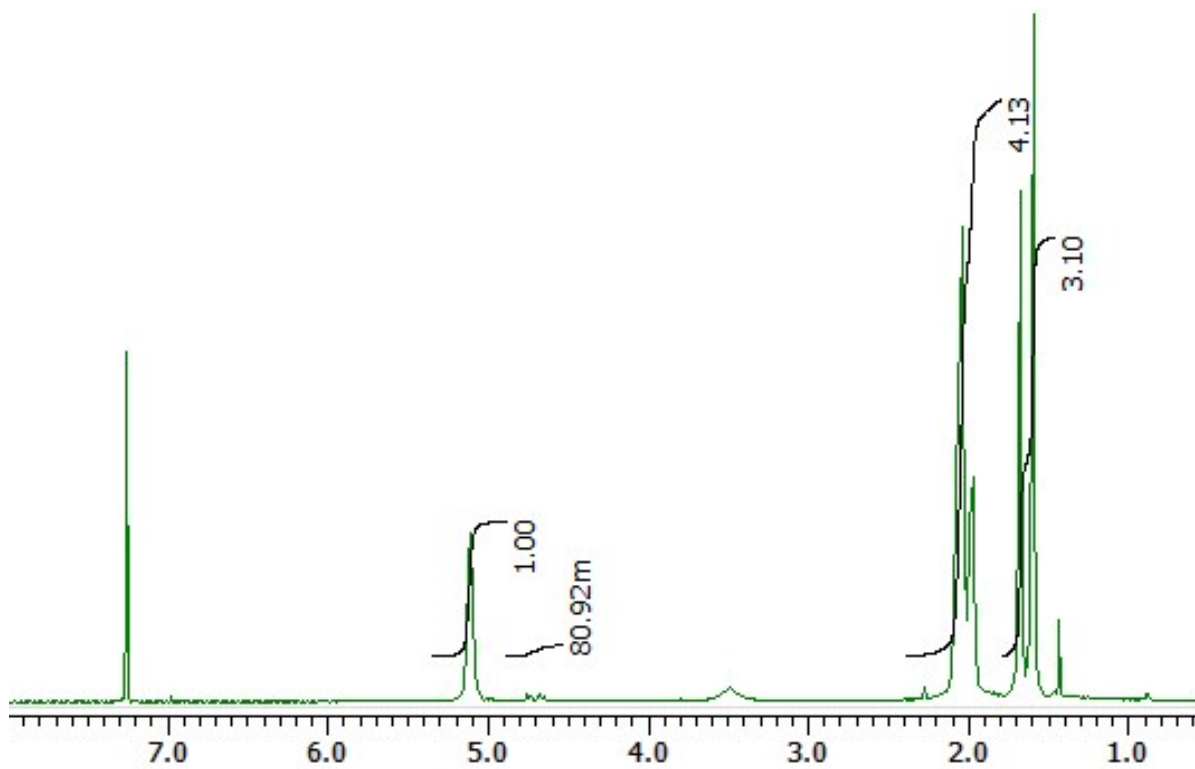

**Figure S16.**  $^1\text{H}$  NMR spectrum of stereodiblock polyisoprene obtained in Table 2, Run 4.

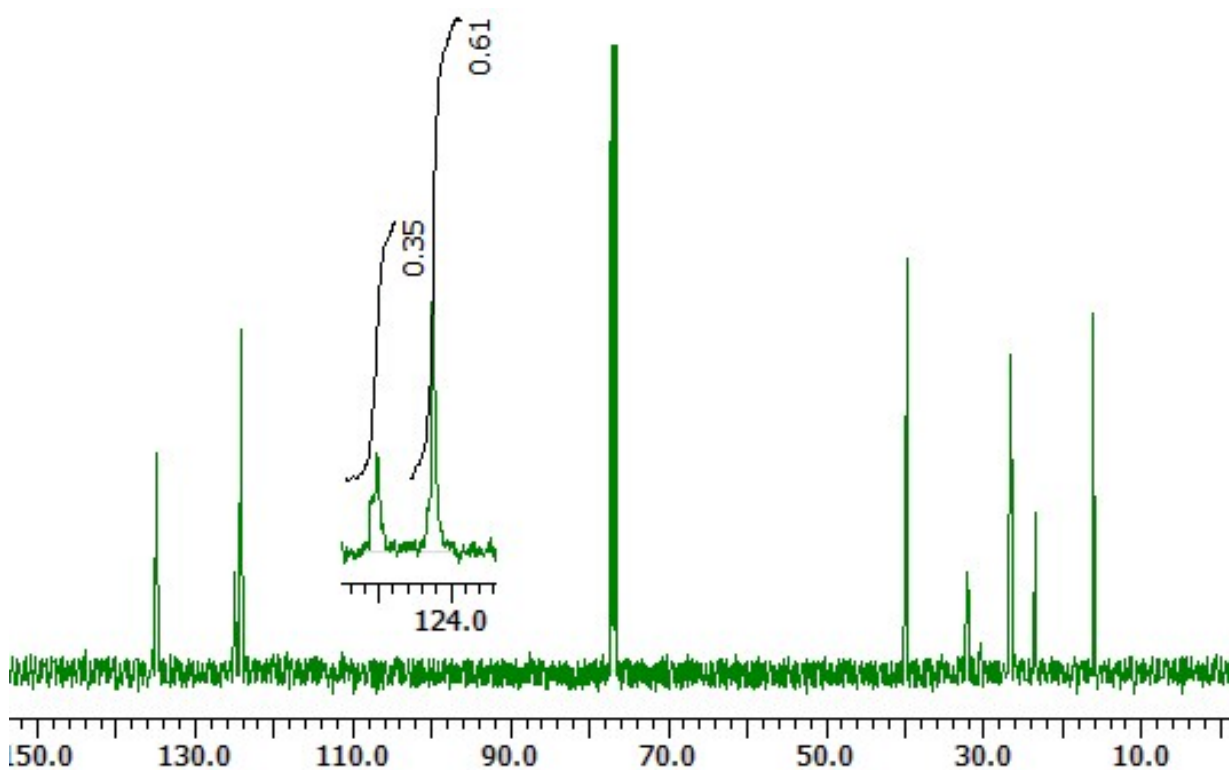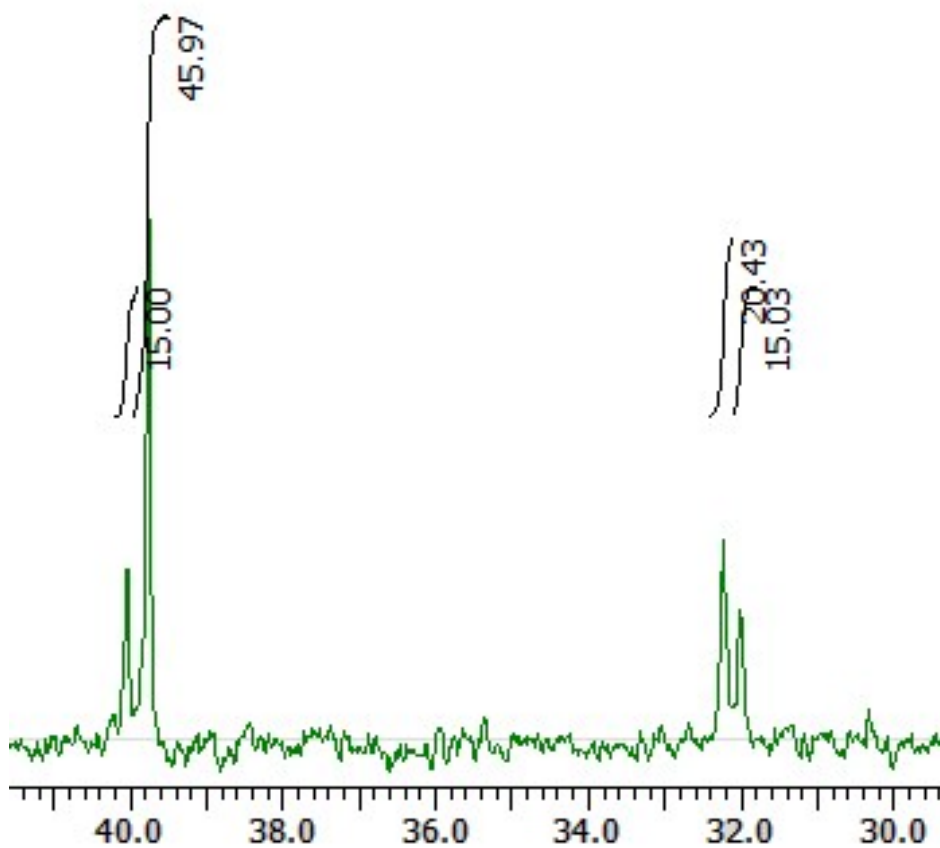

**Figure S17.**  $^{13}\text{C}$  NMR spectrum of stereodiblock polyisoprene obtained in Table 2, Run 3.

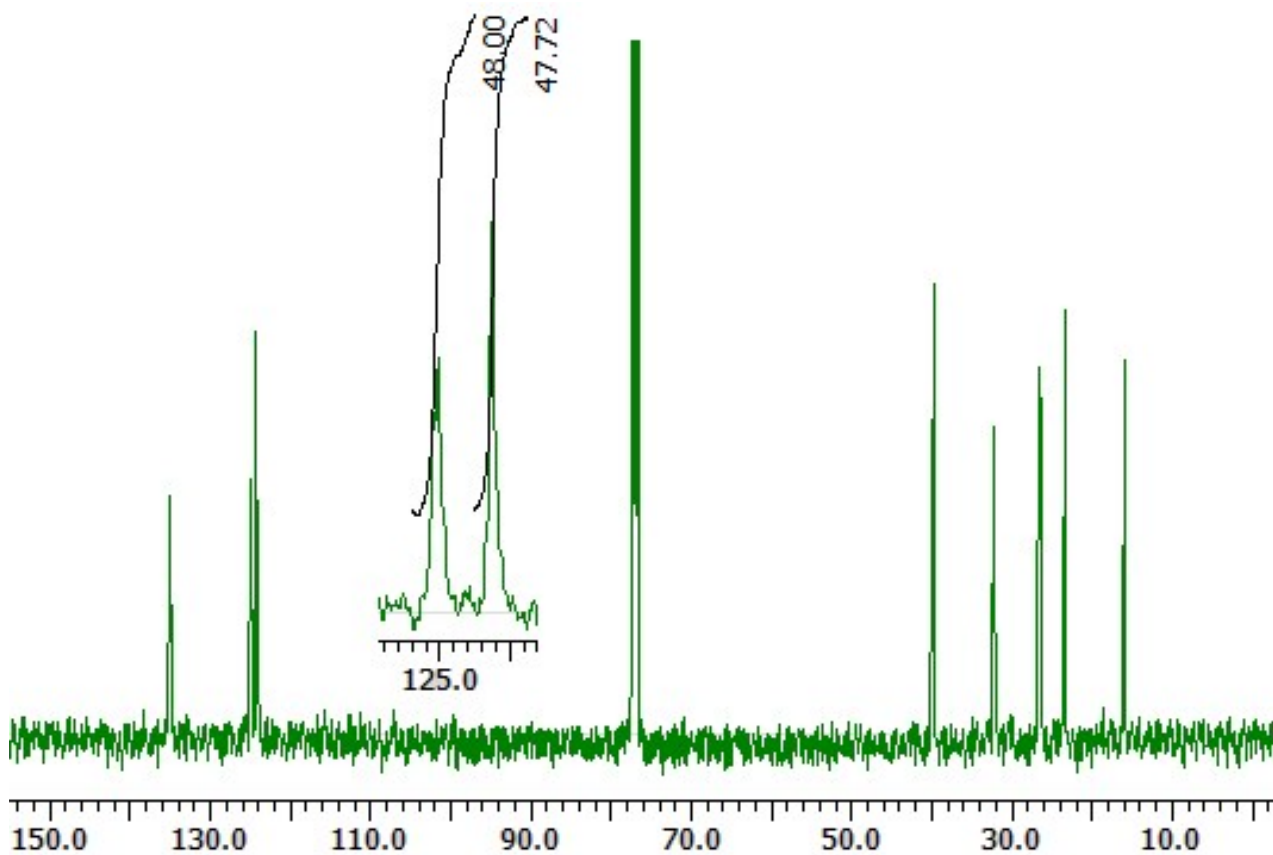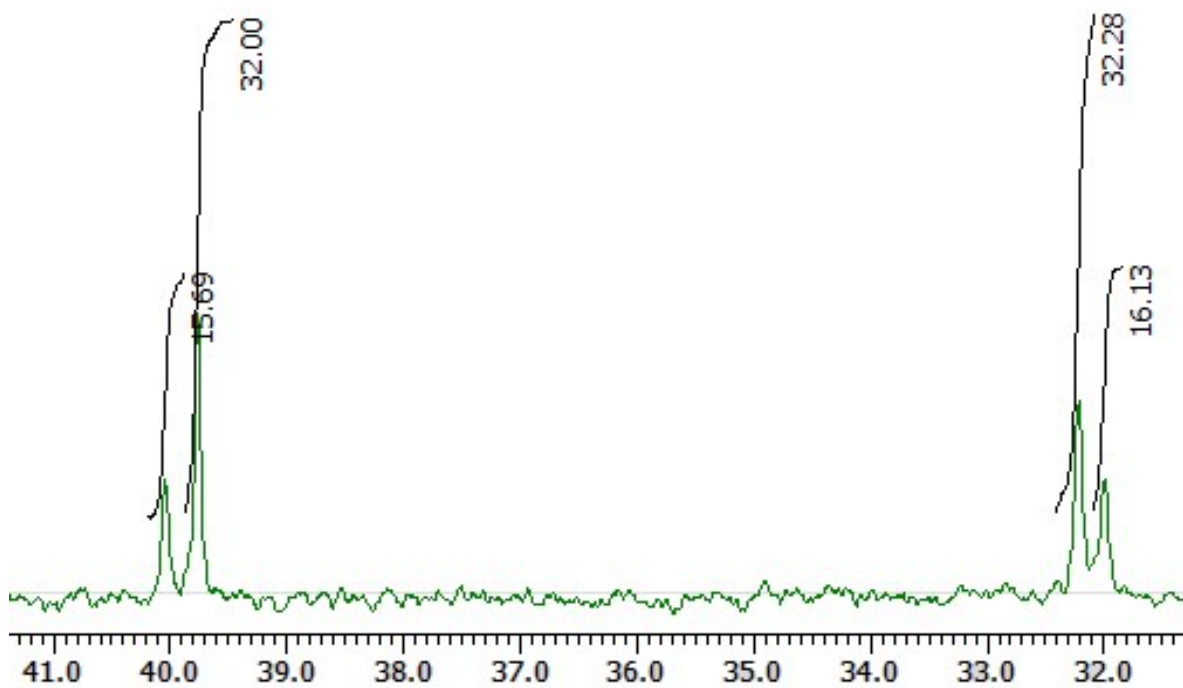

**Figure S18.**  $^{13}\text{C}$  NMR spectrum of stereodiblock polyisoprene obtained in Table 2, Run 4.

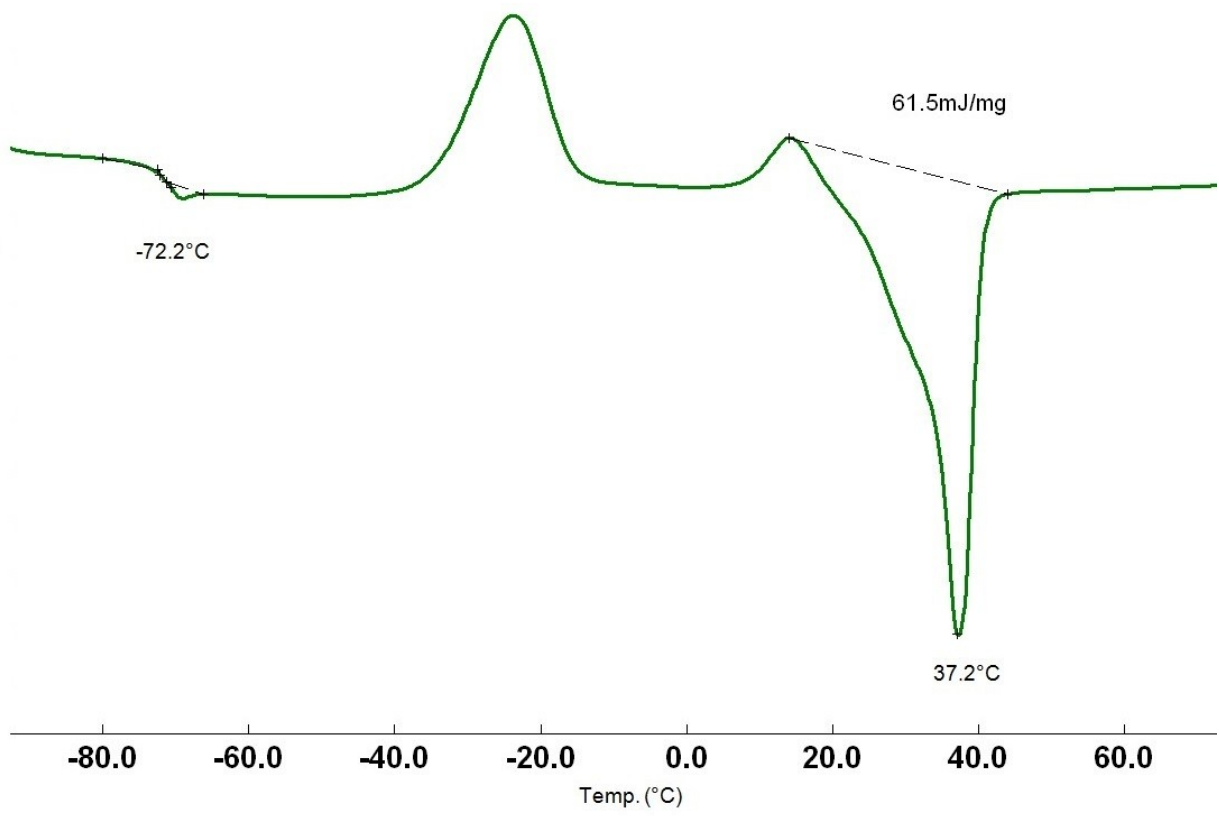

**Figure S19.** DSC chart of *trans*-1,4-polyisoprene obtained in Table 1, Run 1.

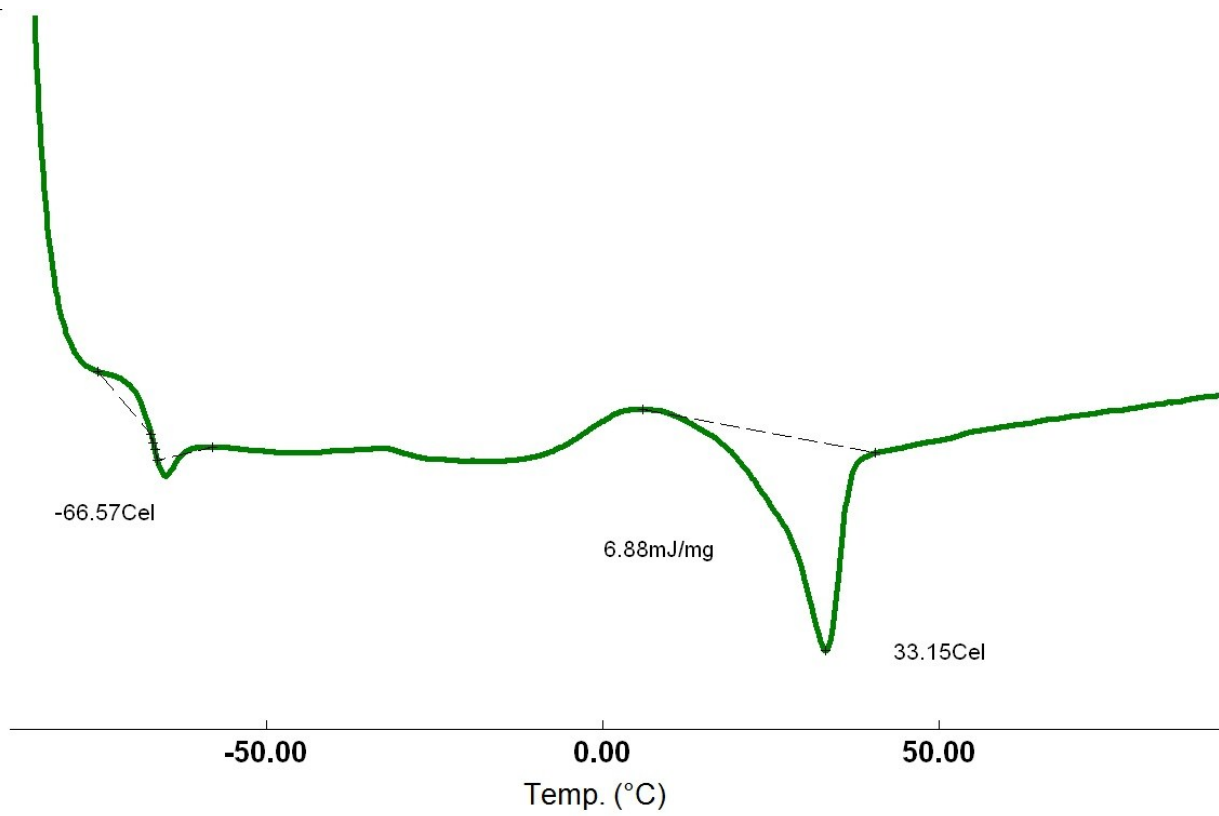

**Figure S20.** DSC chart of stereociblock polyisoprene obtained in Table 2, Run 2.

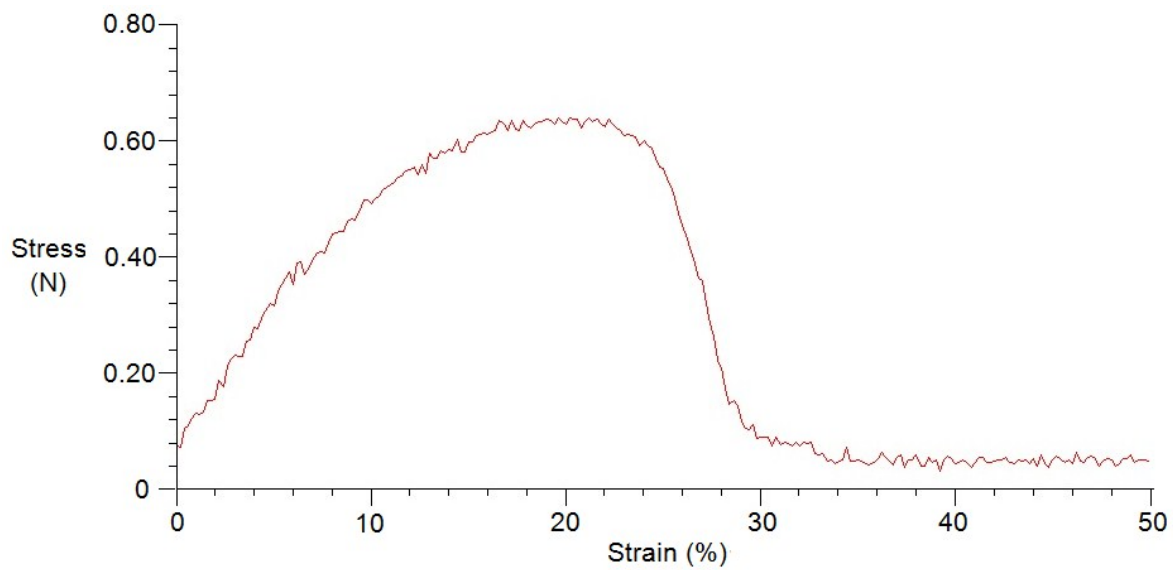

**Figure S21.** Stress-strain curve of the stereodiblock polyisoprene obtained in Table 2, Run 2.
